# Supplementary material
Source: PubMed Central journal article supplement (PMC5902421)
Supplement: NIHMS920400-supplement-supplement_1.pdf [file NIHMS920400-supplement-supplement_1.pdf]

**Table S1:** Clinical testing results and demographic information for study cohort.

| Participant | Age (years) | Bleeding Disorder Diagnosis                      | Secondary diagnosis(es)         | VWF Activity (U/mL) | VWF Antigen (U/mL) | Factor VIII Activity (U/mL) | Hemoglobin (g/dL) | Platelet count (K/cu mm) | Platelet Aggregation Results                             | PFA                           |
|-------------|-------------|--------------------------------------------------|---------------------------------|---------------------|--------------------|-----------------------------|-------------------|--------------------------|----------------------------------------------------------|-------------------------------|
| 1           | 14          | No clinically-identifiable BD; lost to follow up | Vitamin D deficiency            | 1.12                | 0.59               | 1.46                        | 13.5              | 265                      | Not done                                                 | Normal                        |
| 2           | 16          | Hyper-mobile EDS                                 | Iron deficiency anemia          | 1.15                | 0.82               | 1.72                        | 11.4              | 295                      | Not done                                                 | Normal                        |
| 3           | 18          | BD, NOS                                          | Iron deficiency                 | 0.95                | 1.05               | 1.17                        | 13.6              | 306                      | Normal                                                   | Not done                      |
| 4           | 15          | No clinically-identifiable BD                    | Iron deficiency, ovarian cyst   | 0.82                | 0.66               | 1.38                        | 12.6              | 298                      | Not done                                                 | Normal                        |
| 5           | 17          | QPD and thrombocytopenia*                        | Thyroid nodule                  | 1.42                | 1.27               | 2.02                        | 14.2              | 77                       | Normal                                                   | Not done                      |
| 6           | 17          | QPD                                              | Low VWF, iron deficiency anemia | 0.45                | 0.45               | 1.26                        | 11.9              | 513                      | Impaired response to ADP 1:5, epinephrine 1:10 and 1:100 | Epinephrine only prolonged    |
| 7           | 14          | Hyper-mobile EDS                                 | Low VWF                         | 0.43                | 0.38               | 0.87                        | 13.4              | 298                      | Not done                                                 | Normal                        |
| 8           | 15          | No clinically-identifiable BD                    | Iron deficiency                 | 0.8                 | 0.95               | 1.2                         | 13.8              | 302                      | Normal                                                   | Normal                        |
| 9           | 15          | Type 1 VWD                                       | Iron deficiency anemia          | 0.19                | 0.21               | 0.48                        | 11.5              | 331                      | Not done                                                 | ADP only pro-longed           |
| 10          | 17          | Low VWF                                          | None                            | 0.36                | 0.45               | 0.87                        | 13.3              | 258                      | Not done                                                 | Not done                      |
| 11          | 17          | No clinically-identifiable BD                    | None                            | 0.76                | 0.66               | 1.32                        | 14.9              | 301                      | Normal                                                   | Normal                        |
| 12          | 13          | No clinically-identifiable BD                    | Iron deficiency anemia          | 0.84                | 0.77               | 1.52                        | 9.6               | 438                      | Not done                                                 | Normal                        |
| 13          | 14          | No clinically-identifiable BD                    | Iron deficiency                 | 0.7                 | 0.58               | 0.95                        | 12.8              | 253                      | Not done                                                 | Normal                        |
| 14          | 16          | QPD                                              | Iron deficiency                 | 1.44                | 1.14               | 1.44                        | 12.5              | 217                      | Impaired response to ADP 1:5, epinephrine 1:10 and 1:100 | ADP and epinephrine prolonged |
| 15          | 14          | No clinically-identifiable BD                    | Iron deficiency anemia          | 0.62                | 0.63               | 1.29                        | 11.6              | 376                      | Not done                                                 | Not done                      |

\*Platelet-mapping thromboelastography demonstrated a defect in response to ADP. Bleeding symptoms persisted despite improvement of platelet count with steroid administration in this participant.
